# Supplementary material
Source: Springer Nature journal article supplement (https://www.springermedizin.de/resource/supplementary/12970_2010_177_MOESM3_ESM.pdf/9594522)

Isometric Bench (N)

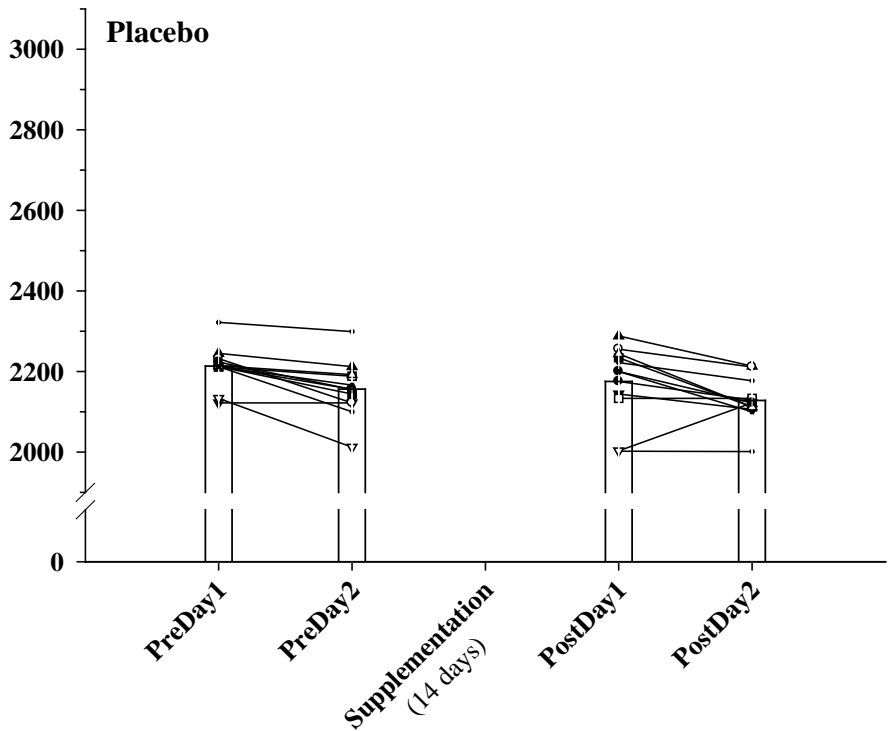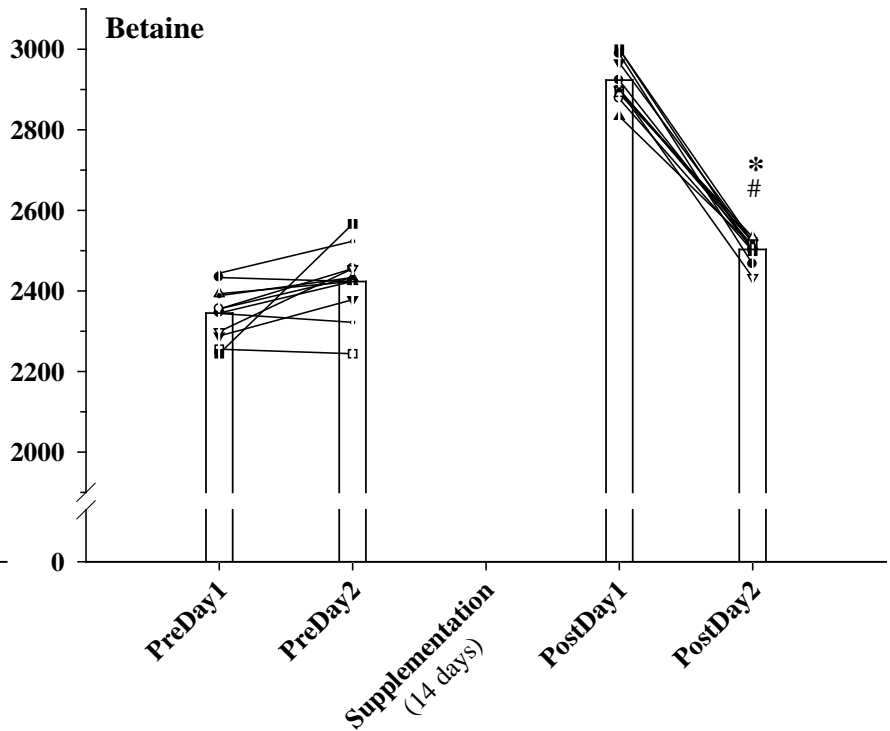

Supplement: MOESM3 [file 9594522]
